# Supplementary material for: Construction of a cancer-targeted nanosystem as a payload of iron complexes to reverse cancer multidrug resistance
Source: Royal Society of Chemistry journal article supplement (doi:10.1039/c4tb02010c), 2015-01-01
Supplement: c4tb02010c1.pdf [file c4tb02010c1.pdf]

## **Construction of cancer-targeted nanosystem as payload of iron complexes to reverse cancer multidrug resistance**

**Lilan Zeng, Jingjing Chen, Shengbin Ji, Leung Chan, Wenjie Zheng, Tianfeng Chen\***

Department of Chemistry, Jinan University, Guangzhou 510632, China

\* To whom correspondence should be addressed. Room 643, Department of Chemistry, Jinan University, Guangzhou 510632, China. Tel: +86 20-85225962; Fax: +86 20 85221263.

\*Corresponding author: Tel: +86 20-85220223; Fax: +86 20 85221263.

**E-mail:** [tchentf@jnu.edu.cn](mailto:tchentf@jnu.edu.cn) (T. Chen)

## Methods

To evaluate the *in vitro* cellular uptake of GAL/Bor@SeNPs, the nanoparticles containing a fluorescent dye coumarin-6, were prepared using a similar procedure. 40  $\mu\text{g}$  of coumarin-6 was added to the reaction system after the addition of  $\text{Fe}(\text{PiP})_3$ . The incorporated coumarin-6 acted as a probe for GAL/Bor@SeNPs and offered a sensitive method to determine its intracellular uptake and localization. The concentration of coumarin-6 labeled on the nanoparticles was investigated using a standard curve method through a fluorescence microplate reader (ex/em wavelengths 430/485 nm).

## RESULTS

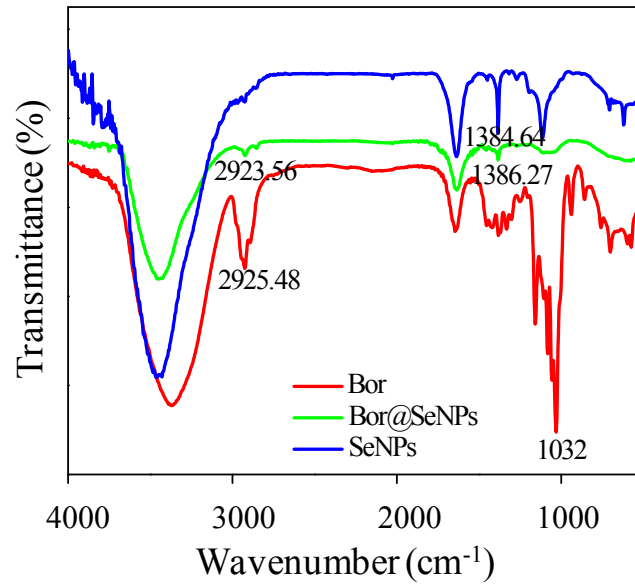

**Fig. S1.** FT-IR spectra of Bor, Bor@SeNPs and SeNPs.

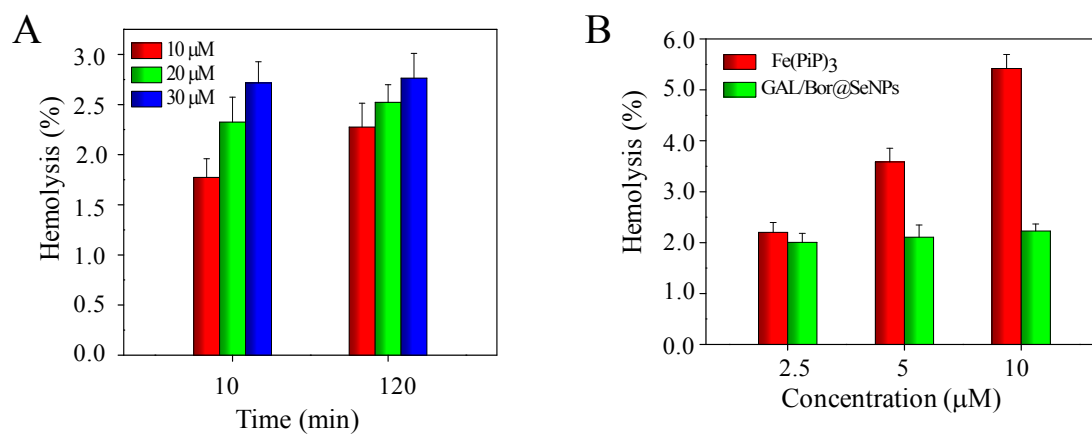

**Fig. S2.** (A) Percentage of RBCs hemolysis incubated by Bor@SeNPs for 10 min and 120 min. (B) Percentage of RBCs hemolysis incubated by different concentrations of Fe(PiP)<sub>3</sub> and GAL/Bor@SeNPs for 10 min. Values expressed were means  $\pm$  SD of triplicate.

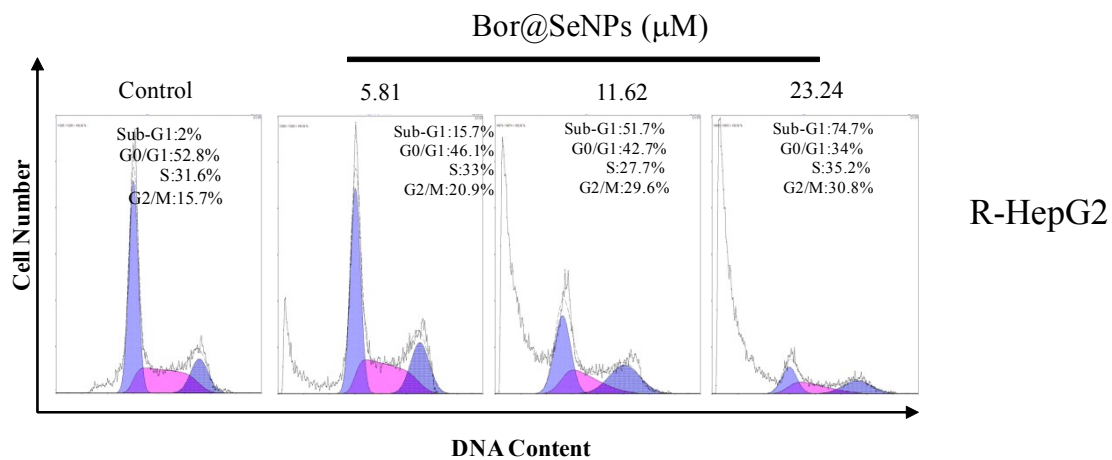

**Fig. S3.** Flow cytometric analysis of Bor@SeNPs-treated R-HepG2 cells for 72h.

**Table S1.** Pharmacokinetic parameters of Fe(PiP)<sub>3</sub> and GAL/Bor@SeNPs after iv injection at an equivalent dose of 5 mg Fe(PiP)<sub>3</sub> per kg of mouse body weight (n=3 per group).

| <b>Parameter</b>                                       | <b>GAL/Bor@SeNPs</b> | <b>Fe(PiP)<sub>3</sub></b> |
|--------------------------------------------------------|----------------------|----------------------------|
| $t_{1/2\beta}$ (h)                                     | 18.7                 | 9.0                        |
| AUC <sub>0-24 h</sub> ( $\mu\text{g/L}\cdot\text{h}$ ) | 268238.4             | 51993.7                    |
| C <sub>max</sub> ( $\mu\text{g/L}$ )                   | 46479.5              | 26105.9                    |
| Cl (mL/h)                                              | 3.72                 | 19.2                       |

$t_{1/2\beta}$  (h), elimination phase, half-life period of medicine.

AUC<sub>0-24 h</sub>, area under curve.

C<sub>max</sub>, maximum concentration observed.

Cl, clearance of medicine.
